# Supplementary material for: The Impact of Caloric and Non-Caloric Sweeteners on Food Intake and Brain Responses to Food: A Randomized Crossover Controlled Trial in Healthy Humans
Source: MDPI journal article supplement (doi:10.3390/nu10050615), 2018-05-15
Supplement: s1 [file s1]

Figure S1

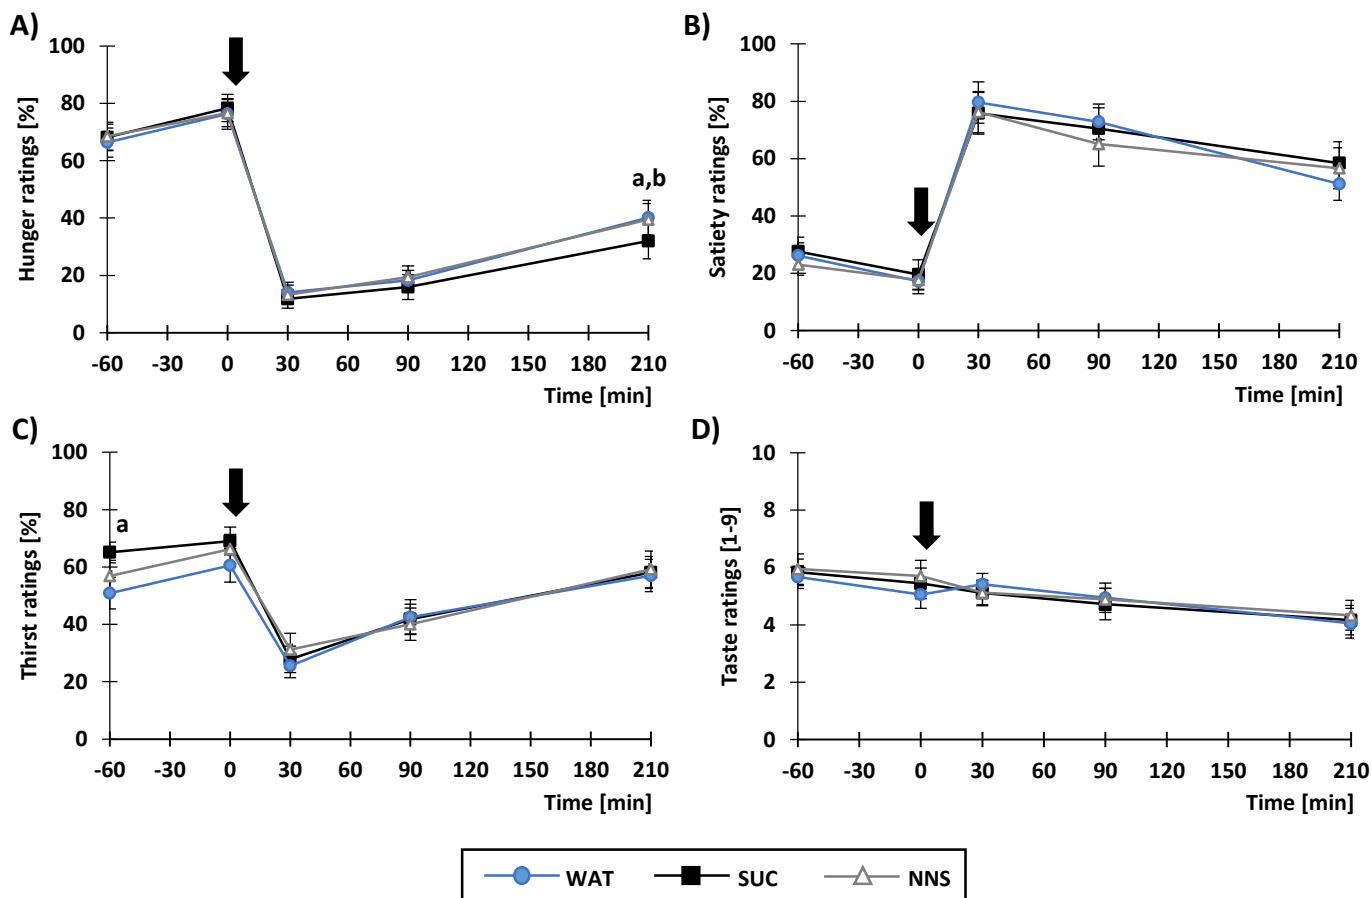

**Figure S1.** Behavioral ratings for hunger (A), satiety (B), thirst (C) and taste cravings (D) in response to drink and concomitant standardized meal ingestion at  $T = 0$  minute, indicated by a black arrow. A taste rating of 1 indicates the maximum preference for a salty item whereas 9 indicates the maximum preference for a sweet item. Data are presented as mean  $\pm$  SEM. <sup>a, b</sup>:  $p < 0.05$  for post-hoc paired t-tests (two-tailed), respectively between SUC-WAT and SUC-NNS. WAT, SUC, NNS: Water-, Sucrose-, NNS-beverage conditions.
